# Supplementary material for: Herbal Medicine Prescriptions for Functional Dyspepsia: A Nationwide Population-Based Study in Korea
Source: PubMed Central journal article supplement (PMC8817847; doi:10.1155/2022/3306420), 2022-01-29
Supplement: 3306420.f1.pdf [file 3306420.f1.pdf]

Supplement 1. List of the 56 herbal medicines that are used for functional dyspepsia in Korea

| No. | Korean (漢字)          | Romanization of Korean   | Chinese                 | Japanese                |
|-----|----------------------|--------------------------|-------------------------|-------------------------|
| 1   | 가미소요산 (加味逍遙散)        | Gamisoyo-san             | Jiaweixiaoyao-san       | Kamishoyo-san           |
| 2   | 갈근탕 (葛根湯)            | Galgeun-tang             | Gegen-tang              | Kakkon-to               |
| 3   | 갈근해기탕 (葛根解肌湯)        | Galgeunhaegui-tang       | Gegenchengqi-tang       | N/A                     |
| 4   | 구미강활탕 (九味羌活湯)        | Gumiganghwal-tang        | Jiuweiqianghuo-tang     | Kumikyokatsu-to         |
| 5   | 궁소산 (芍蘇散)            | Gungso-san               | Qionsu-san              | N/A                     |
| 6   | 궁하탕 (芍夏湯)            | Gungha-tang              | Qionxia-tang            | N/A                     |
| 7   | 내소산 (內消散)            | Naeso-san                | Neixiao-san             | Naishou-san             |
| 8   | 당귀연교음 (當歸連翹飲)        | Danggwiyeongyo-eum       | Danguilianqiao-yin      | N/A                     |
| 9   | 당귀육황탕 (當歸六黃湯)        | Danguiyukhwang-tang      | Danguiliuhuang-tang     | Tokirikuoto             |
| 10  | 대시호탕 (大柴胡湯)          | Daeshiho-tang            | Dachaihu-tang           | Daisaiko-to             |
| 11  | 대청룡탕 (大靑龍湯)          | Daecheonglyong-tang      | Daqinglong-tang         | N/A                     |
| 12  | 대화중음 (大和中飲)          | Daehwajung-eum           | Dahezong-yin            | N/A                     |
| 13  | 대황목단피탕 (大黃牡丹皮湯)      | Daehwangmokdanpi-tang    | Dahuangmudan-tang       | N/A                     |
| 14  | 도인승기탕 (桃仁承氣湯)        | Doinseunggi-tang         | Taorengchengqi-tang     | N/A                     |
| 15  | 반하백출천마탕<br>(半夏白朮天麻湯) | Banhbakchulcheonma-tang  | Banxiabaizhutianma-tang | Hangebyakujutsutenma-to |
| 16  | 반하사심탕 (半夏瀉心湯)        | Banhasasim-tang          | Banxiaxixin-tang        | Hangeshashin-to         |
| 17  | 반하후박탕 (半夏厚朴湯)        | Banhahubak-tang          | Banxiahoupo-tang        | Hange Koboku-To         |
| 18  | 백출탕 (白朮湯)            | Baekchool-tang           | Baizhu-tang             | N/A                     |
| 19  | 보중익기탕 (補中益氣湯)        | Bojungikgi-tang          | Buzhongyiqi-tang        | Hochuekki-To            |
| 20  | 보허탕 (補虛湯)            | Boheo-tang               | Buxu-tang               | N/A                     |
| 21  | 복령보심탕 (茯苓補心湯)        | Bokryongbosim-tang       | Fulingbuxin-tang        | N/A                     |
| 22  | 불환금정기산 (不換金正氣散)      | Bulhwangeumjeonggi-san   | Buhuanjinzhengqi-san    | Fukankinshokisan        |
| 23  | 삼소음 (參蘇飲)            | Samsoeum                 | Shensuyin               | Jinsoin                 |
| 24  | 삼출건비탕 (參朮健脾湯)        | Samchulgeonbi-tang       | Shenzhujianpi-tang      | Sanjutsukenhi-to        |
| 25  | 삼호작약탕 (參胡芍藥湯)        | Samhojagyak-tang         | Shenhusaoyao-tang       | N/A                     |
| 26  | 삼황사심탕 (三黃瀉心湯)        | Samhwangsasim-tang       | Sanhuangxiexin-tang     | N/A                     |
| 27  | 생맥산 (生脈散)            | Saengmaek-san            | Shengmai-san            | Seimyaku-san            |
| 28  | 소시호탕 (小柴胡湯)          | Sosiho-tang              | Xiaochaihu-tang         | Shosaiko-to             |
| 29  | 소청룡탕 (小靑龍湯)          | Socheongryong-tang       | Xiaoqinglong-tang       | Shoseiryu-to            |
| 30  | 승양보위탕 (升陽補胃湯)        | Seungyangbowi-tang       | Shengyangbuwei-tang     | N/A                     |
| 31  | 시경반하탕 (柴梗半夏湯)        | Sigyongbanha-tang        | Chaigengbanxia-tang     | N/A                     |
| 32  | 시호계지탕 (柴胡桂枝湯)        | Sihogyaji-tang           | Chaihuguijizhi-tang     | Saikokeishito           |
| 33  | 시호소간탕 (柴胡疏肝湯)        | Sihosogan-tang           | Chaihushugan-tang       | N/A                     |
| 34  | 시호청간탕 (柴胡淸肝湯)        | Sihocheonggan-tang       | Chaihuqinggan-tang      | N/A                     |
| 35  | 안태음 (安胎飲)            | Antae-eum                | Antai-yin               | N/A                     |
| 36  | 연교패독산 (蓮翹敗毒散)        | Yeonkyopaedok-san        | Lianqiaobaidu-san       | N/A                     |
| 37  | 오림산 (五淋散)            | Orim-san                 | Wulin-san               | N/A                     |
| 38  | 오적산 (五積散)            | Ojeok-san                | Wuji-san                | Goshaku-san             |
| 39  | 이중탕 (理中湯)            | Yijung-tang              | Lizhong-tang            | Richu-to                |
| 40  | 이진탕 (二陳湯)            | Yijin-tang               | Erchen-tang             | Nichin-to               |
| 41  | 익위승양탕 (益胃升陽湯)        | Ikwiseungyang-tang       | Yiweishengyang-tang     | N/A                     |
| 42  | 인삼패독산 (人蔘敗毒散)        | Insampaedok-san          | Renshenbaidu-san        | Ninjinhaidokusan        |
| 43  | 인진호탕 (茵陳蒿湯)          | Injinho-tang             | Yinchenhao-tang         | Inchin-ko-to            |
| 44  | 자음강화탕 (滋陰降火湯)        | Jaumganghwa-tang         | Ziyinjianghuo-tang      | Jiinkoka-to             |
| 45  | 조위승기탕 (調胃承氣湯)        | Jowiseunggi-tang         | Tiaoweichengqi-tang     | Choi-Joki-To            |
| 46  | 청상견통탕 (淸上鑷痛湯)        | Cheongsanggyeontong-tang | Qingshangjuantong-tang  | Seijkentsuto            |
| 47  | 청서익기탕 (淸暑益氣湯)        | Cheongseokgi-tang        | Qingshuyiqi-wan         | N/A                     |
| 48  | 청위산 (淸胃散)            | Cheongwi-san             | Qingwei-san             | N/A                     |
| 49  | 팔물탕 (八物湯)            | Palmul-tang              | Bawu-tang               | N/A                     |
| 50  | 평위산 (平胃散)            | Pyeongwi-san             | Pingwei-san             | Heii-san                |
| 51  | 행소탕 (杏蘇湯)            | Haengso-tang             | Xingsu-tang             | N/A                     |
| 52  | 향사평위산 (香砂平胃散)        | Hyangsapyeongwi-san      | Xiangshapingwei-san     | Koshaheii-san           |
| 53  | 형개연교탕 (荊芥連翹湯)        | Hyeonggaeyeongyo-tang    | Jingjielianqiao-tang    | Keigai-Rengyo-to        |
| 54  | 황금작약탕 (黃芩芍藥湯)        | Hwanggeumjagyak-tang     | Huangqinshaoyao-tang    | N/A                     |

|    |               |                       |                     |               |
|----|---------------|-----------------------|---------------------|---------------|
| 55 | 황련해독탕 (黃連解毒湯) | Hwanglyeonhaedok-tang | Huanglianjiedu-tang | Orengedoku-to |
| 56 | 회춘양격산 (回春凉膈散) | Hochunyanggyeok-san   | Huichunliangge-san  | N/A           |

Supplement 2. Number of prescriptions and cost of 56 herbal medicines by year

(a) Number of prescription

| No | Herbal medicine          | 2010    |       | 2011    |       | 2012    |       | 2013    |       | 2014    |       | 2015    |       | 2016    |       | 2017    |       | 2018    |       | 2019    |       | Total     |       |
|----|--------------------------|---------|-------|---------|-------|---------|-------|---------|-------|---------|-------|---------|-------|---------|-------|---------|-------|---------|-------|---------|-------|-----------|-------|
|    |                          | N       | %     | N       | %     | N       | %     | N       | %     | N       | %     | N       | %     | N       | %     | N       | %     | N       | %     | N       | %     | N         | %     |
| 1  | Pyeongwi-san             | 137,268 | 25.59 | 370,394 | 28.67 | 418,100 | 28.37 | 455,593 | 27.71 | 553,546 | 29.59 | 639,085 | 31.15 | 710,098 | 30.65 | 917,320 | 35.14 | 892,825 | 33.34 | 939,000 | 32.22 | 6,033,229 | 31.12 |
| 2  | Hyangsapyeongwi-san      | 175,312 | 32.68 | 368,600 | 28.53 | 413,535 | 28.06 | 454,472 | 27.64 | 498,065 | 26.63 | 502,511 | 24.49 | 546,622 | 23.59 | 530,574 | 20.32 | 492,851 | 18.40 | 515,295 | 17.68 | 4,497,837 | 23.20 |
| 3  | Gungha-tang              | 1,607   | 0.30  | 23,738  | 1.84  | 35,172  | 2.39  | 53,187  | 3.24  | 97,120  | 5.19  | 144,803 | 7.06  | 170,606 | 7.36  | 197,924 | 7.58  | 218,960 | 8.18  | 279,448 | 9.59  | 1,222,565 | 6.31  |
| 4  | Banhasasim-tang          | 29,853  | 5.57  | 64,866  | 5.02  | 74,712  | 5.07  | 81,275  | 4.94  | 92,546  | 4.95  | 105,325 | 5.13  | 134,347 | 5.80  | 171,379 | 6.56  | 211,894 | 7.91  | 244,799 | 8.40  | 1,210,996 | 6.25  |
| 5  | Yijin-tang               | 9,875   | 1.84  | 64,622  | 5.00  | 87,529  | 5.94  | 122,227 | 7.43  | 139,314 | 7.45  | 111,691 | 5.44  | 125,348 | 5.41  | 168,539 | 6.46  | 164,839 | 6.15  | 175,254 | 6.01  | 1,169,238 | 6.03  |
| 6  | Naeso-san                | 58,347  | 10.88 | 94,605  | 7.32  | 100,221 | 6.80  | 101,668 | 6.18  | 90,768  | 4.85  | 97,575  | 4.76  | 100,137 | 4.32  | 95,419  | 3.66  | 90,674  | 3.39  | 88,517  | 3.04  | 917,931   | 4.73  |
| 7  | Bojungikgi-tang          | 11,024  | 2.06  | 55,129  | 4.27  | 60,993  | 4.14  | 67,901  | 4.13  | 64,939  | 3.47  | 69,999  | 3.41  | 83,392  | 3.60  | 79,762  | 3.06  | 107,317 | 4.01  | 129,579 | 4.45  | 730,035   | 3.77  |
| 8  | Bulhwangumjeonggi-san    | 16,640  | 3.10  | 37,019  | 2.87  | 49,122  | 3.33  | 53,417  | 3.25  | 58,439  | 3.12  | 65,922  | 3.21  | 80,755  | 3.49  | 82,352  | 3.15  | 84,907  | 3.17  | 100,666 | 3.45  | 629,239   | 3.25  |
| 9  | Ojeok-san                | 9,365   | 1.75  | 41,253  | 3.19  | 40,207  | 2.73  | 47,535  | 2.89  | 51,141  | 2.73  | 69,566  | 3.39  | 83,319  | 3.60  | 84,732  | 3.25  | 98,659  | 3.68  | 98,150  | 3.37  | 623,927   | 3.22  |
| 10 | Banhabakchulcheonma-tang | 18,849  | 3.51  | 32,380  | 2.51  | 38,064  | 2.58  | 39,768  | 2.42  | 41,420  | 2.21  | 48,328  | 2.36  | 49,827  | 2.15  | 48,948  | 1.87  | 52,531  | 1.96  | 59,983  | 2.06  | 430,098   | 2.22  |
| 11 | Samchulgeonbi-tang       | 14,163  | 2.64  | 20,517  | 1.59  | 20,996  | 1.42  | 21,254  | 1.29  | 21,763  | 1.16  | 23,512  | 1.15  | 25,688  | 1.11  | 25,988  | 1.00  | 35,833  | 1.34  | 30,431  | 1.04  | 240,145   | 1.24  |
| 12 | Gumiganghwal-tang        | 2,938   | 0.55  | 10,095  | 0.78  | 13,211  | 0.90  | 15,209  | 0.93  | 16,621  | 0.89  | 18,135  | 0.88  | 23,814  | 1.03  | 22,333  | 0.86  | 25,804  | 0.96  | 30,233  | 1.04  | 178,393   | 0.92  |
| 13 | Socheongryong-tang       | 5,325   | 0.99  | 10,023  | 0.78  | 11,361  | 0.77  | 12,485  | 0.76  | 13,668  | 0.73  | 14,677  | 0.72  | 17,833  | 0.77  | 19,016  | 0.73  | 22,494  | 0.84  | 24,381  | 0.84  | 151,263   | 0.78  |
| 14 | Daehwajung-eum           | 8,408   | 1.57  | 12,522  | 0.97  | 14,389  | 0.98  | 13,669  | 0.83  | 13,487  | 0.72  | 12,984  | 0.63  | 17,177  | 0.74  | 11,267  | 0.43  | 12,405  | 0.46  | 11,682  | 0.40  | 127,990   | 0.66  |
| 15 | Yijung-tang              | 4,098   | 0.76  | 9,417   | 0.73  | 10,597  | 0.72  | 13,383  | 0.81  | 13,076  | 0.70  | 13,574  | 0.66  | 15,349  | 0.66  | 14,158  | 0.54  | 14,866  | 0.56  | 14,591  | 0.50  | 123,109   | 0.63  |
| 16 | Sosiho-tang              | 4,313   | 0.80  | 8,878   | 0.69  | 11,278  | 0.77  | 10,569  | 0.64  | 12,020  | 0.64  | 11,894  | 0.58  | 12,743  | 0.55  | 14,171  | 0.54  | 15,698  | 0.59  | 16,950  | 0.58  | 118,514   | 0.61  |
| 17 | Samsoeum                 | 5,548   | 1.03  | 9,207   | 0.71  | 10,387  | 0.70  | 11,101  | 0.68  | 12,290  | 0.66  | 12,374  | 0.60  | 13,694  | 0.59  | 12,599  | 0.48  | 13,734  | 0.51  | 13,871  | 0.48  | 114,805   | 0.59  |
| 18 | Gamisoyo-san             | 3,626   | 0.68  | 8,012   | 0.62  | 8,038   | 0.55  | 8,471   | 0.52  | 9,284   | 0.50  | 10,663  | 0.52  | 11,937  | 0.52  | 12,795  | 0.49  | 13,575  | 0.51  | 15,446  | 0.53  | 101,847   | 0.53  |
| 19 | Banhabubak-tang          | 3,219   | 0.60  | 5,154   | 0.40  | 8,355   | 0.57  | 7,447   | 0.45  | 8,197   | 0.44  | 10,003  | 0.49  | 11,651  | 0.50  | 11,607  | 0.44  | 14,934  | 0.56  | 17,936  | 0.62  | 98,503    | 0.51  |
| 20 | Galgeun-tang             | 2,452   | 0.46  | 4,165   | 0.32  | 4,142   | 0.28  | 4,391   | 0.27  | 6,923   | 0.37  | 8,581   | 0.42  | 10,770  | 0.46  | 12,215  | 0.47  | 13,310  | 0.50  | 18,807  | 0.65  | 85,756    | 0.44  |
| 21 | Yeonkyopaedok-san        | 2,120   | 0.40  | 4,752   | 0.37  | 4,871   | 0.33  | 5,673   | 0.35  | 8,401   | 0.45  | 10,078  | 0.49  | 10,724  | 0.46  | 10,416  | 0.40  | 10,727  | 0.40  | 13,005  | 0.45  | 80,767    | 0.42  |
| 22 | Hwanglyeonhaedok-tang    | 589     | 0.11  | 2,598   | 0.20  | 3,128   | 0.21  | 4,086   | 0.25  | 3,293   | 0.18  | 3,210   | 0.16  | 4,916   | 0.21  | 7,847   | 0.30  | 10,913  | 0.41  | 11,428  | 0.39  | 52,008    | 0.27  |
| 23 | Hyeonggaeyeongyo-tang    | 1,120   | 0.21  | 2,881   | 0.22  | 2,734   | 0.19  | 2,962   | 0.18  | 4,244   | 0.23  | 4,940   | 0.24  | 5,486   | 0.24  | 5,828   | 0.22  | 7,752   | 0.29  | 9,474   | 0.33  | 47,421    | 0.24  |
| 24 | Jaumganghwa-tang         | 577     | 0.11  | 2,851   | 0.22  | 3,565   | 0.24  | 3,691   | 0.22  | 4,662   | 0.25  | 4,617   | 0.23  | 5,393   | 0.23  | 5,681   | 0.22  | 6,630   | 0.25  | 8,548   | 0.29  | 46,215    | 0.24  |
| 25 | Insampaedok-san          | 2,660   | 0.50  | 4,558   | 0.35  | 4,078   | 0.28  | 4,221   | 0.26  | 4,199   | 0.22  | 4,390   | 0.21  | 5,529   | 0.24  | 4,532   | 0.17  | 4,478   | 0.17  | 4,736   | 0.16  | 43,381    | 0.22  |

|    |                          |     |      |       |      |       |      |       |      |       |      |       |      |       |      |       |      |       |      |       |      |        |      |
|----|--------------------------|-----|------|-------|------|-------|------|-------|------|-------|------|-------|------|-------|------|-------|------|-------|------|-------|------|--------|------|
| 26 | Jowiseunggi-tang         | 754 | 0.14 | 2,599 | 0.20 | 2,837 | 0.19 | 3,445 | 0.21 | 4,134 | 0.22 | 4,062 | 0.20 | 5,318 | 0.23 | 5,020 | 0.19 | 5,536 | 0.21 | 5,688 | 0.20 | 39,393 | 0.20 |
| 27 | Saengmaek-san            | 230 | 0.04 | 3,170 | 0.25 | 4,265 | 0.29 | 4,099 | 0.25 | 3,717 | 0.20 | 4,004 | 0.20 | 4,874 | 0.21 | 4,987 | 0.19 | 4,000 | 0.15 | 4,464 | 0.15 | 37,810 | 0.20 |
| 28 | Palmul-tang              | 490 | 0.09 | 1,469 | 0.11 | 1,575 | 0.11 | 1,644 | 0.10 | 3,396 | 0.18 | 4,792 | 0.23 | 4,961 | 0.21 | 6,862 | 0.26 | 5,887 | 0.22 | 5,786 | 0.20 | 36,862 | 0.19 |
| 29 | Cheongsanggyeontong-tang | 946 | 0.18 | 3,367 | 0.26 | 2,616 | 0.18 | 2,415 | 0.15 | 2,798 | 0.15 | 2,368 | 0.12 | 3,242 | 0.14 | 2,968 | 0.11 | 2,860 | 0.11 | 2,855 | 0.10 | 26,435 | 0.14 |
| 30 | Sihogyegi-tang           | 794 | 0.15 | 1,466 | 0.11 | 1,581 | 0.11 | 1,672 | 0.10 | 2,186 | 0.12 | 2,635 | 0.13 | 2,971 | 0.13 | 3,044 | 0.12 | 3,224 | 0.12 | 3,100 | 0.11 | 22,673 | 0.12 |
| 31 | Doinseunggi-tang         | 505 | 0.09 | 1,540 | 0.12 | 1,692 | 0.11 | 2,508 | 0.15 | 2,260 | 0.12 | 2,162 | 0.11 | 2,647 | 0.11 | 2,613 | 0.10 | 2,167 | 0.08 | 2,531 | 0.09 | 20,625 | 0.11 |
| 32 | Daeshiho-tang            | 861 | 0.16 | 1,451 | 0.11 | 1,472 | 0.10 | 1,708 | 0.10 | 2,464 | 0.13 | 2,651 | 0.13 | 2,223 | 0.10 | 2,242 | 0.09 | 2,449 | 0.09 | 2,399 | 0.08 | 19,920 | 0.10 |
| 33 | Galgeunhaegui-tang       | 499 | 0.09 | 1,436 | 0.11 | 1,395 | 0.09 | 1,771 | 0.11 | 1,957 | 0.10 | 1,766 | 0.09 | 2,102 | 0.09 | 2,126 | 0.08 | 2,136 | 0.08 | 2,191 | 0.08 | 17,379 | 0.09 |
| 34 | Haengso-tang             | 297 | 0.06 | 830   | 0.06 | 742   | 0.05 | 738   | 0.04 | 756   | 0.04 | 1,734 | 0.08 | 2,813 | 0.12 | 2,071 | 0.08 | 1,978 | 0.07 | 2,507 | 0.09 | 14,466 | 0.07 |
| 35 | Samhwangsasim-tang       | 171 | 0.03 | 569   | 0.04 | 855   | 0.06 | 1,042 | 0.06 | 909   | 0.05 | 1,198 | 0.06 | 1,720 | 0.07 | 1,518 | 0.06 | 1,316 | 0.05 | 1,026 | 0.04 | 10,324 | 0.05 |
| 36 | Sihosogan-tang           | 249 | 0.05 | 396   | 0.03 | 607   | 0.04 | 836   | 0.05 | 931   | 0.05 | 884   | 0.04 | 1,211 | 0.05 | 1,715 | 0.07 | 1,429 | 0.05 | 1,696 | 0.06 | 9,954  | 0.05 |
| 37 | Orim-san                 | 105 | 0.02 | 529   | 0.04 | 295   | 0.02 | 1,027 | 0.06 | 795   | 0.04 | 583   | 0.03 | 786   | 0.03 | 920   | 0.04 | 952   | 0.04 | 894   | 0.03 | 6,886  | 0.04 |
| 38 | Cheongseoikgi-tang       | 130 | 0.02 | 330   | 0.03 | 706   | 0.05 | 653   | 0.04 | 601   | 0.03 | 532   | 0.03 | 789   | 0.03 | 634   | 0.02 | 1,021 | 0.04 | 568   | 0.02 | 5,964  | 0.03 |
| 39 | Ikwiseungyang-tang       | 98  | 0.02 | 1,438 | 0.11 | 1,085 | 0.07 | 665   | 0.04 | 338   | 0.02 | 242   | 0.01 | 180   | 0.01 | 215   | 0.01 | 162   | 0.01 | 763   | 0.03 | 5,186  | 0.03 |
| 40 | Bokryongbosim-tang       | 45  | 0.01 | 460   | 0.04 | 394   | 0.03 | 531   | 0.03 | 671   | 0.04 | 503   | 0.02 | 363   | 0.02 | 735   | 0.03 | 659   | 0.02 | 626   | 0.02 | 4,987  | 0.03 |
| 41 | Hwanggeumjagyak-tang     | 67  | 0.01 | 540   | 0.04 | 459   | 0.03 | 604   | 0.04 | 502   | 0.03 | 344   | 0.02 | 617   | 0.03 | 994   | 0.04 | 216   | 0.01 | 120   | 0.00 | 4,463  | 0.02 |
| 42 | Hoechunyanggyeok-san     | 104 | 0.02 | 369   | 0.03 | 393   | 0.03 | 465   | 0.03 | 423   | 0.02 | 415   | 0.02 | 628   | 0.03 | 698   | 0.03 | 524   | 0.02 | 432   | 0.01 | 4,451  | 0.02 |
| 43 | Daehwangmokdanpi-tang    | 110 | 0.02 | 263   | 0.02 | 324   | 0.02 | 287   | 0.02 | 294   | 0.02 | 419   | 0.02 | 504   | 0.02 | 507   | 0.02 | 641   | 0.02 | 1,024 | 0.04 | 4,373  | 0.02 |
| 44 | Baekchool-tang           | 125 | 0.02 | 157   | 0.01 | 159   | 0.01 | 99    | 0.01 | 52    | 0.00 | 802   | 0.04 | 303   | 0.01 | 32    | 0.00 | 61    | 0.00 | 1,651 | 0.06 | 3,441  | 0.02 |
| 45 | Cheongwi-san             | 73  | 0.01 | 70    | 0.01 | 67    | 0.00 | 97    | 0.01 | 60    | 0.00 | 28    | 0.00 | 30    | 0.00 | 1,676 | 0.06 | 912   | 0.03 | 240   | 0.01 | 3,253  | 0.02 |
| 46 | Sigyeongbanha-tang       | 114 | 0.02 | 262   | 0.02 | 453   | 0.03 | 337   | 0.02 | 282   | 0.02 | 207   | 0.01 | 407   | 0.02 | 362   | 0.01 | 465   | 0.02 | 316   | 0.01 | 3,205  | 0.02 |
| 47 | Daechyeonglyong-tang     | 66  | 0.01 | 174   | 0.01 | 222   | 0.02 | 230   | 0.01 | 289   | 0.02 | 328   | 0.02 | 296   | 0.01 | 320   | 0.01 | 174   | 0.01 | 162   | 0.01 | 2,261  | 0.01 |
| 48 | Injinho-tang             | 131 | 0.02 | 243   | 0.02 | 157   | 0.01 | 213   | 0.01 | 120   | 0.01 | 187   | 0.01 | 238   | 0.01 | 175   | 0.01 | 216   | 0.01 | 371   | 0.01 | 2,051  | 0.01 |
| 49 | Dangguyukhwang-tang      | 9   | 0.00 | 36    | 0.00 | 111   | 0.01 | 204   | 0.01 | 432   | 0.02 | 291   | 0.01 | 243   | 0.01 | 167   | 0.01 | 153   | 0.01 | 15    | 0.00 | 1,661  | 0.01 |
| 50 | Boheo-tang               | 12  | 0.00 | 199   | 0.02 | 185   | 0.01 | 415   | 0.03 | 136   | 0.01 | 48    | 0.00 | 131   | 0.01 | 196   | 0.01 | 134   | 0.01 | 71    | 0.00 | 1,527  | 0.01 |
| 51 | Seungyangbowi-tang       | 9   | 0.00 | 88    | 0.01 | 149   | 0.01 | 450   | 0.03 | 211   | 0.01 | 115   | 0.01 | 87    | 0.00 | 173   | 0.01 | 54    | 0.00 | 112   | 0.00 | 1,448  | 0.01 |
| 52 | Sihocheonggan-tang       | 38  | 0.01 | 103   | 0.01 | 58    | 0.00 | 82    | 0.00 | 136   | 0.01 | 123   | 0.01 | 159   | 0.01 | 158   | 0.01 | 194   | 0.01 | 196   | 0.01 | 1,247  | 0.01 |
| 53 | Danggwiyongyo-eum        | 11  | 0.00 | 4     | 0.00 | 6     | 0.00 | 20    | 0.00 | 89    | 0.00 | 25    | 0.00 | 23    | 0.00 | 6     | 0.00 | 5     | 0.00 | 94    | 0.00 | 283    | 0.00 |
| 54 | Gungso-san               | 5   | 0.00 | 85    | 0.01 | 64    | 0.00 | 29    | 0.00 | 13    | 0.00 | 8     | 0.00 | 9     | 0.00 | 17    | 0.00 | 5     | 0.00 | 3     | 0.00 | 238    | 0.00 |
| 55 | Samhojagyak-tang         | 26  | 0.00 | 21    | 0.00 | 13    | 0.00 | 41    | 0.00 | 20    | 0.00 | 13    | 0.00 | 2     | 0.00 | 11    | 0.00 | 15    | 0.00 | 31    | 0.00 | 193    | 0.00 |

|           |           |         |        |           |        |           |        |           |        |           |        |           |        |           |        |           |        |           |        |           |        |            |        |
|-----------|-----------|---------|--------|-----------|--------|-----------|--------|-----------|--------|-----------|--------|-----------|--------|-----------|--------|-----------|--------|-----------|--------|-----------|--------|------------|--------|
| 56        | Antae-eum | 2       | 0.00   | 2         | 0.00   | 3         | 0.00   | 6         | 0.00   | 24        | 0.00   | 4         | 0.00   | 1         | 0.00   | 2         | 0.00   | 8         | 0.00   | 25        | 0.00   | 77         | 0.00   |
| Sub-total |           | 536,372 | 100.00 | 1,291,902 | 100.00 | 1,473,725 | 100.00 | 1,643,988 | 100.00 | 1,870,422 | 100.00 | 2,051,910 | 100.00 | 2,317,033 | 100.00 | 2,610,566 | 100.00 | 2,678,163 | 100.00 | 2,914,167 | 100.00 | 19,388,248 | 100.00 |

(b) Cost

| N o. | Herbal medicine          | 2010        |       | 2011        |       | 2012        |       | 2013        |       | 2014        |       | 2015        |       | 2016        |       | 2017        |       | 2018          |       | 2019          |       | Total         |       |
|------|--------------------------|-------------|-------|-------------|-------|-------------|-------|-------------|-------|-------------|-------|-------------|-------|-------------|-------|-------------|-------|---------------|-------|---------------|-------|---------------|-------|
|      |                          | KRW         | %     | KRW         | %     | KRW         | %     | KRW         | %     | KRW         | %     | KRW         | %     | KRW         | %     | KRW         | %     | KRW           | %     | KRW           | %     | KRW           | %     |
| 1    | Hyangsapyeongwi-san      | 370,765,585 | 24.08 | 603,152,763 | 22.86 | 661,839,241 | 22.77 | 701,833,526 | 22.48 | 734,089,002 | 22.19 | 762,636,516 | 21.29 | 807,296,015 | 19.68 | 786,662,661 | 17.59 | 784,696,236   | 15.35 | 838,107,304   | 14.92 | 7,051,079,037 | 19.37 |
| 2    | Banhasasim-tang          | 164,156,701 | 10.66 | 283,978,588 | 10.76 | 330,168,531 | 11.36 | 362,280,640 | 11.61 | 476,946,717 | 14.42 | 575,457,095 | 16.07 | 738,075,224 | 17.99 | 923,069,884 | 20.64 | 1,150,180,292 | 22.50 | 1,366,051,109 | 24.32 | 6,370,364,917 | 17.50 |
| 3    | Pyeongwi-san             | 242,648,590 | 15.76 | 472,457,748 | 17.91 | 523,936,871 | 18.02 | 552,749,902 | 17.71 | 518,149,351 | 15.66 | 525,474,837 | 14.67 | 579,442,461 | 14.13 | 731,869,649 | 16.37 | 752,928,784   | 14.73 | 787,907,861   | 14.03 | 5,687,566,199 | 15.63 |
| 4    | Naeso-san                | 165,729,889 | 10.77 | 233,535,778 | 8.85  | 239,670,947 | 8.24  | 240,321,394 | 7.70  | 221,407,864 | 6.69  | 241,326,898 | 6.74  | 250,249,762 | 6.10  | 247,549,044 | 5.54  | 253,425,980   | 4.96  | 242,211,056   | 4.31  | 2,335,428,678 | 6.42  |
| 5    | Bojungikgi-tang          | 46,886,338  | 3.05  | 114,742,000 | 4.35  | 125,822,017 | 4.33  | 139,017,924 | 4.45  | 148,100,340 | 4.48  | 167,787,079 | 4.68  | 205,714,434 | 5.01  | 224,665,299 | 5.02  | 343,817,779   | 6.73  | 389,266,157   | 6.93  | 1,905,819,409 | 5.24  |
| 6    | Banhabakchulcheonma-tang | 103,152,830 | 6.70  | 133,224,830 | 5.05  | 143,553,715 | 4.94  | 147,212,740 | 4.72  | 166,911,155 | 5.05  | 199,328,345 | 5.56  | 217,396,502 | 5.30  | 217,229,192 | 4.86  | 231,588,294   | 4.53  | 258,905,584   | 4.61  | 1,818,503,234 | 5.00  |
| 7    | Ojeok-san                | 41,876,921  | 2.72  | 109,125,489 | 4.14  | 98,930,218  | 3.40  | 117,081,542 | 3.75  | 116,428,288 | 3.52  | 140,527,212 | 3.92  | 176,732,293 | 4.31  | 182,120,769 | 4.07  | 199,006,487   | 3.89  | 200,420,096   | 3.57  | 1,382,249,349 | 3.80  |
| 8    | Bulhwangeumjeonggi-san   | 45,923,447  | 2.98  | 81,758,823  | 3.10  | 107,959,170 | 3.71  | 113,738,951 | 3.64  | 108,775,206 | 3.29  | 112,836,251 | 3.15  | 130,107,657 | 3.17  | 137,218,140 | 3.07  | 156,332,038   | 3.06  | 184,209,161   | 3.28  | 1,178,858,873 | 3.24  |
| 9    | Yijin-tang               | 19,727,860  | 1.28  | 68,415,307  | 2.59  | 89,161,606  | 3.07  | 114,758,332 | 3.68  | 118,368,066 | 3.58  | 97,039,763  | 2.71  | 113,184,379 | 2.76  | 153,586,157 | 3.43  | 159,030,601   | 3.11  | 170,948,800   | 3.04  | 1,104,220,897 | 3.03  |
| 10   | Gungha-tang              | 2,625,391   | 0.17  | 21,640,046  | 0.82  | 31,307,574  | 1.08  | 47,297,323  | 1.52  | 72,400,360  | 2.19  | 101,225,658 | 2.83  | 120,699,144 | 2.94  | 147,447,779 | 3.30  | 163,599,025   | 3.20  | 211,584,617   | 3.77  | 919,827,205   | 2.53  |
| 11   | Samchulgeonbi-tang       | 82,913,474  | 5.39  | 97,051,126  | 3.68  | 97,082,182  | 3.34  | 92,464,583  | 2.96  | 87,407,541  | 2.64  | 87,453,758  | 2.44  | 98,279,986  | 2.40  | 9,830,314   | 0.22  | 132,227,297   | 2.59  | 120,993,593   | 2.15  | 905,703,880   | 2.49  |
| 12   | Sosih-tang               | 24,175,537  | 1.57  | 42,058,166  | 1.59  | 51,772,427  | 1.78  | 50,819,664  | 1.63  | 62,181,818  | 1.88  | 68,864,509  | 1.92  | 75,720,815  | 1.85  | 88,353,267  | 1.98  | 97,402,598    | 1.91  | 106,465,446   | 1.90  | 667,814,263   | 1.83  |
| 13   | Samsuem                  | 26,709,779  | 1.74  | 37,521,136  | 1.42  | 42,355,457  | 1.46  | 43,565,626  | 1.40  | 52,339,243  | 1.58  | 53,148,743  | 1.48  | 62,719,693  | 1.53  | 59,725,491  | 1.34  | 64,476,733    | 1.26  | 66,054,711    | 1.18  | 508,616,625   | 1.40  |
| 14   | Socheongryong-tang       | 18,917,210  | 1.23  | 29,719,458  | 1.13  | 33,062,912  | 1.14  | 36,562,669  | 1.17  | 44,822,628  | 1.35  | 48,315,004  | 1.35  | 57,760,190  | 1.41  | 64,014,409  | 1.43  | 76,594,741    | 1.50  | 84,628,476    | 1.51  | 494,397,709   | 1.36  |
| 15   | Yijung-tang              | 17,884,982  | 1.16  | 29,990,427  | 1.14  | 31,837,464  | 1.10  | 37,140,329  | 1.19  | 45,510,069  | 1.38  | 55,005,097  | 1.54  | 63,907,644  | 1.56  | 64,440,806  | 1.44  | 64,760,675    | 1.27  | 65,661,472    | 1.17  | 476,138,977   | 1.31  |
| 16   | Gumiganghwal-tang        | 13,094,430  | 0.85  | 29,785,163  | 1.13  | 36,526,289  | 1.26  | 38,824,760  | 1.24  | 39,694,435  | 1.20  | 42,315,394  | 1.18  | 54,093,851  | 1.32  | 52,123,805  | 1.17  | 60,551,095    | 1.18  | 67,167,478    | 1.20  | 434,176,711   | 1.19  |
| 17   | Gamisoyo-san             | 19,986,843  | 1.30  | 32,596,523  | 1.24  | 31,256,707  | 1.08  | 33,677,853  | 1.08  | 31,537,605  | 0.95  | 33,296,802  | 0.93  | 37,312,707  | 0.91  | 44,024,552  | 0.98  | 50,341,420    | 0.98  | 54,986,797    | 0.98  | 369,017,818   | 1.01  |
| 18   | Yeonkyopaedok-san        | 12,937,819  | 0.84  | 22,672,399  | 0.86  | 24,117,726  | 0.83  | 28,020,189  | 0.90  | 31,690,021  | 0.96  | 33,791,945  | 0.94  | 36,113,516  | 0.88  | 38,069,800  | 0.85  | 41,836,673    | 0.82  | 49,561,881    | 0.88  | 318,811,977   | 0.88  |
| 19   | Banhahubak-tang          | 13,928,195  | 0.90  | 19,529,435  | 0.74  | 25,698,004  | 0.88  | 26,907,833  | 0.86  | 24,913,482  | 0.75  | 25,421,809  | 0.71  | 29,222,922  | 0.71  | 30,642,295  | 0.69  | 38,702,969    | 0.76  | 42,815,068    | 0.76  | 277,782,019   | 0.76  |
| 20   | Daehwajung-eum           | 21,196,318  | 1.38  | 26,935,322  | 1.02  | 29,393,687  | 1.01  | 26,535,418  | 0.85  | 24,441,536  | 0.74  | 23,384,791  | 0.65  | 28,115,984  | 0.69  | 22,410,675  | 0.50  | 25,179,327    | 0.49  | 22,765,511    | 0.41  | 250,358,576   | 0.69  |
| 21   | Insampaedok-san          | 15,046,827  | 0.98  | 21,809,911  | 0.83  | 20,277,600  | 0.70  | 19,891,693  | 0.64  | 23,216,002  | 0.70  | 25,803,808  | 0.72  | 30,372,296  | 0.74  | 29,526,754  | 0.66  | 28,420,388    | 0.56  | 31,954,459    | 0.57  | 246,319,745   | 0.68  |
| 22   | Galgeun-tang             | 18,527,983  | 1.20  | 22,969,988  | 0.87  | 21,817,833  | 0.75  | 23,231,425  | 0.74  | 15,705,056  | 0.47  | 11,820,971  | 0.33  | 17,183,548  | 0.42  | 16,525,876  | 0.37  | 17,542,544    | 0.34  | 23,606,066    | 0.42  | 188,931,296   | 0.52  |
| 23   | Palmul-tang              | 8,204,844   | 0.53  | 16,568,279  | 0.63  | 15,176,094  | 0.52  | 16,267,250  | 0.52  | 14,553,354  | 0.44  | 17,204,428  | 0.48  | 20,227,175  | 0.49  | 25,987,870  | 0.58  | 25,290,155    | 0.49  | 27,849,378    | 0.50  | 187,328,832   | 0.51  |

|    |                          |           |      |            |      |            |      |            |      |            |      |            |      |            |      |            |      |            |      |            |      |             |      |
|----|--------------------------|-----------|------|------------|------|------------|------|------------|------|------------|------|------------|------|------------|------|------------|------|------------|------|------------|------|-------------|------|
| 24 | Hyeonggaeyeongyotang     | 4,738,557 | 0.31 | 8,329,623  | 0.32 | 9,074,641  | 0.31 | 9,840,935  | 0.32 | 15,077,291 | 0.46 | 17,455,797 | 0.49 | 20,367,621 | 0.50 | 24,718,301 | 0.55 | 31,961,949 | 0.63 | 37,891,091 | 0.67 | 179,455,810 | 0.49 |
| 25 | Daeshiho-tang            | 7,188,824 | 0.47 | 10,978,108 | 0.42 | 11,332,922 | 0.39 | 18,548,097 | 0.59 | 25,403,432 | 0.77 | 24,822,622 | 0.69 | 20,033,940 | 0.49 | 16,067,447 | 0.36 | 17,994,591 | 0.35 | 19,958,591 | 0.36 | 172,328,579 | 0.47 |
| 26 | Hwanglyeonhaedok-tang    | 2,484,028 | 0.16 | 5,594,191  | 0.21 | 6,479,795  | 0.22 | 8,973,791  | 0.29 | 8,499,811  | 0.26 | 8,919,049  | 0.25 | 11,790,034 | 0.29 | 21,457,402 | 0.48 | 32,598,395 | 0.64 | 32,355,629 | 0.58 | 139,152,128 | 0.38 |
| 27 | Jaumganghwa-tang         | 2,898,639 | 0.19 | 8,888,019  | 0.34 | 10,294,593 | 0.35 | 10,500,327 | 0.34 | 11,685,852 | 0.35 | 12,121,624 | 0.34 | 13,834,435 | 0.34 | 15,222,728 | 0.34 | 17,565,027 | 0.34 | 22,973,634 | 0.41 | 125,984,881 | 0.35 |
| 28 | Sihogyegi-tang           | 4,672,299 | 0.30 | 5,915,098  | 0.22 | 6,698,169  | 0.23 | 6,802,152  | 0.22 | 8,789,729  | 0.27 | 9,478,958  | 0.26 | 11,493,535 | 0.28 | 16,414,257 | 0.37 | 16,800,790 | 0.33 | 17,873,169 | 0.32 | 104,938,158 | 0.29 |
| 29 | Cheongsanggyeontong-tang | 4,424,596 | 0.29 | 10,859,736 | 0.41 | 8,175,335  | 0.28 | 8,222,479  | 0.26 | 9,212,809  | 0.28 | 8,545,803  | 0.24 | 10,912,526 | 0.27 | 10,559,756 | 0.24 | 10,304,674 | 0.20 | 1,150,947  | 0.02 | 82,368,663  | 0.23 |
| 30 | Saengmaek-san            | 1,077,253 | 0.07 | 4,917,061  | 0.19 | 6,757,778  | 0.23 | 7,362,913  | 0.24 | 7,589,040  | 0.23 | 8,628,256  | 0.24 | 10,343,869 | 0.25 | 11,848,526 | 0.26 | 10,931,826 | 0.21 | 11,944,770 | 0.21 | 81,401,294  | 0.22 |
| 31 | Galgeunhaegui-tang       | 2,186,432 | 0.14 | 4,468,449  | 0.17 | 4,357,345  | 0.15 | 4,492,771  | 0.14 | 6,954,384  | 0.21 | 6,686,724  | 0.19 | 7,886,679  | 0.19 | 9,617,531  | 0.22 | 8,601,557  | 0.17 | 7,262,608  | 0.13 | 62,514,482  | 0.17 |
| 32 | Jowiseunggi-tang         | 1,881,719 | 0.12 | 4,378,819  | 0.17 | 5,873,940  | 0.20 | 5,729,221  | 0.18 | 5,599,675  | 0.17 | 6,063,943  | 0.17 | 7,104,201  | 0.17 | 7,727,643  | 0.17 | 8,406,682  | 0.16 | 8,691,634  | 0.15 | 61,457,479  | 0.17 |
| 33 | Doinseunggi-tang         | 1,421,132 | 0.09 | 3,244,144  | 0.12 | 3,697,349  | 0.13 | 4,600,563  | 0.15 | 4,313,425  | 0.13 | 4,425,000  | 0.12 | 5,165,793  | 0.13 | 5,799,278  | 0.13 | 5,414,547  | 0.11 | 6,176,986  | 0.11 | 44,258,218  | 0.12 |
| 34 | Haengso-tang             | 1,564,833 | 0.10 | 2,952,373  | 0.11 | 2,898,898  | 0.10 | 2,910,881  | 0.09 | 2,566,220  | 0.08 | 4,798,441  | 0.13 | 6,202,708  | 0.15 | 5,969,745  | 0.13 | 5,550,970  | 0.11 | 7,429,875  | 0.13 | 42,844,945  | 0.12 |
| 35 | Sihosogan-tang           | 1,252,540 | 0.08 | 2,002,150  | 0.08 | 2,590,627  | 0.09 | 3,631,128  | 0.12 | 3,664,550  | 0.11 | 2,499,954  | 0.07 | 2,812,664  | 0.07 | 3,531,703  | 0.08 | 3,729,324  | 0.07 | 4,242,180  | 0.08 | 29,956,821  | 0.08 |
| 36 | Samhwangsasim-tang       | 906,041   | 0.06 | 1,607,341  | 0.06 | 2,385,716  | 0.08 | 3,012,351  | 0.10 | 1,669,107  | 0.05 | 2,319,914  | 0.06 | 4,631,174  | 0.11 | 3,653,692  | 0.08 | 3,519,054  | 0.07 | 2,376,718  | 0.04 | 26,081,109  | 0.07 |
| 37 | Bokryongbosim-tang       | 505,120   | 0.03 | 1,819,328  | 0.07 | 2,116,800  | 0.07 | 2,985,112  | 0.10 | 3,622,050  | 0.11 | 2,499,257  | 0.07 | 2,609,450  | 0.06 | 2,882,476  | 0.06 | 2,899,409  | 0.06 | 2,851,627  | 0.05 | 24,790,630  | 0.07 |
| 38 | Sigyeongbanha-tang       | 549,320   | 0.04 | 1,166,913  | 0.04 | 1,537,733  | 0.05 | 1,519,614  | 0.05 | 1,529,244  | 0.05 | 1,378,992  | 0.04 | 3,014,145  | 0.07 | 2,595,575  | 0.06 | 2,300,387  | 0.04 | 2,120,703  | 0.04 | 17,712,626  | 0.05 |
| 39 | Cheongseoiki-tang        | 425,488   | 0.03 | 699,940    | 0.03 | 1,615,632  | 0.06 | 1,230,958  | 0.04 | 1,893,415  | 0.06 | 1,550,511  | 0.04 | 2,340,559  | 0.06 | 1,909,908  | 0.04 | 2,298,885  | 0.04 | 1,381,010  | 0.02 | 15,346,306  | 0.04 |
| 40 | Hoechunyanggyeoksan      | 565,376   | 0.04 | 1,121,440  | 0.04 | 1,161,098  | 0.04 | 1,506,805  | 0.05 | 1,354,847  | 0.04 | 1,268,313  | 0.04 | 1,647,573  | 0.04 | 2,005,111  | 0.04 | 2,051,235  | 0.04 | 1,410,620  | 0.03 | 14,092,418  | 0.04 |
| 41 | Sihocheonggan-tang       | 389,689   | 0.03 | 669,968    | 0.03 | 426,774    | 0.01 | 589,698    | 0.02 | 1,584,524  | 0.05 | 1,536,074  | 0.04 | 1,191,433  | 0.03 | 1,891,339  | 0.04 | 2,026,280  | 0.04 | 2,443,028  | 0.04 | 12,748,807  | 0.04 |
| 42 | Orim-san                 | 435,113   | 0.03 | 981,326    | 0.04 | 577,482    | 0.02 | 1,306,759  | 0.04 | 977,743    | 0.03 | 992,189    | 0.03 | 1,477,767  | 0.04 | 1,665,574  | 0.04 | 2,157,902  | 0.04 | 2,131,645  | 0.04 | 12,703,500  | 0.03 |
| 43 | Ikwiseungyang-tang       | 310,375   | 0.02 | 1,737,506  | 0.07 | 1,696,880  | 0.06 | 1,292,349  | 0.04 | 821,570    | 0.02 | 483,136    | 0.01 | 1,297,799  | 0.03 | 1,773,321  | 0.04 | 1,523,330  | 0.03 | 1,450,371  | 0.03 | 12,386,637  | 0.03 |
| 44 | Daehwangmokdanpitang     | 439,680   | 0.03 | 878,182    | 0.03 | 912,640    | 0.03 | 982,400    | 0.03 | 1,018,548  | 0.03 | 1,071,515  | 0.03 | 1,302,388  | 0.03 | 1,371,681  | 0.03 | 1,662,870  | 0.03 | 2,727,848  | 0.05 | 12,367,752  | 0.03 |
| 45 | Baekchool-tang           | 387,584   | 0.03 | 457,962    | 0.02 | 376,367    | 0.01 | 466,593    | 0.01 | 167,735    | 0.01 | 1,787,737  | 0.05 | 953,101    | 0.02 | 153,307    | 0.00 | 211,804    | 0.00 | 2,204,162  | 0.04 | 7,166,352   | 0.02 |
| 46 | Injinho-tang             | 626,672   | 0.04 | 698,845    | 0.03 | 546,874    | 0.02 | 838,614    | 0.03 | 581,652    | 0.02 | 483,995    | 0.01 | 661,065    | 0.02 | 554,876    | 0.01 | 705,329    | 0.01 | 1,100,438  | 0.02 | 6,798,360   | 0.02 |
| 47 | Boheo-tang               | 63,294    | 0.00 | 516,216    | 0.02 | 571,290    | 0.02 | 876,252    | 0.03 | 634,677    | 0.02 | 432,029    | 0.01 | 651,602    | 0.02 | 697,926    | 0.02 | 882,516    | 0.02 | 870,210    | 0.02 | 6,196,012   | 0.02 |
| 48 | Daecheonglyong-tang      | 325,320   | 0.02 | 574,602    | 0.02 | 623,917    | 0.02 | 719,449    | 0.02 | 763,047    | 0.02 | 664,074    | 0.02 | 710,328    | 0.02 | 643,321    | 0.01 | 344,035    | 0.01 | 340,189    | 0.01 | 5,708,282   | 0.02 |
| 49 | Hwanggeumjagyaktang      | 121,737   | 0.01 | 552,223    | 0.02 | 557,608    | 0.02 | 675,533    | 0.02 | 417,384    | 0.01 | 377,425    | 0.01 | 675,061    | 0.02 | 959,218    | 0.02 | 238,428    | 0.00 | 133,352    | 0.00 | 4,707,969   | 0.01 |
| 50 | Cheongwi-san             | 212,866   | 0.01 | 239,828    | 0.01 | 132,297    | 0.00 | 180,367    | 0.01 | 250,453    | 0.01 | 132,327    | 0.00 | 125,671    | 0.00 | 1,796,123  | 0.04 | 1,065,341  | 0.02 | 269,711    | 0.00 | 4,404,984   | 0.01 |
| 51 | Dangguyukhwang-tang      | 64,182    | 0.00 | 67,728     | 0.00 | 258,207    | 0.01 | 409,024    | 0.01 | 1,160,438  | 0.04 | 711,313    | 0.02 | 596,195    | 0.01 | 543,225    | 0.01 | 422,967    | 0.01 | 29,475     | 0.00 | 4,262,754   | 0.01 |
| 52 | Seungyangbowi-tang       | 77,767    | 0.01 | 159,128    | 0.01 | 290,154    | 0.01 | 1,114,871  | 0.04 | 377,742    | 0.01 | 149,352    | 0.00 | 102,312    | 0.00 | 205,800    | 0.00 | 53,104     | 0.00 | 131,712    | 0.00 | 2,661,942   | 0.01 |
| 53 | Danggiwiyeongyoeum       | 55,936    | 0.00 | 19,456     | 0.00 | 17,024     | 0.00 | 49,856     | 0.00 | 109,355    | 0.00 | 43,485     | 0.00 | 105,725    | 0.00 | 20,070     | 0.00 | 10,035     | 0.00 | 1,303,435  | 0.02 | 1,734,377   | 0.00 |

|           |                  |                   |            |                   |            |                   |            |                   |            |                   |            |                   |            |                   |            |                   |            |                   |            |                   |            |                    |            |
|-----------|------------------|-------------------|------------|-------------------|------------|-------------------|------------|-------------------|------------|-------------------|------------|-------------------|------------|-------------------|------------|-------------------|------------|-------------------|------------|-------------------|------------|--------------------|------------|
| 54        | Samhojagyak-tang | 123,060           | 0.01       | 77,352            | 0.00       | 42,754            | 0.00       | 90,987            | 0.00       | 124,816           | 0.00       | 37,189            | 0.00       | 7,292             | 0.00       | 85,681            | 0.00       | 98,442            | 0.00       | 80,214            | 0.00       | 767,787            | 0.00       |
| 55        | Gungso-san       | 15,444            | 0.00       | 163,592           | 0.01       | 137,852           | 0.00       | 70,928            | 0.00       | 24,854            | 0.00       | 17,570            | 0.00       | 18,072            | 0.00       | 29,518            | 0.00       | 15,606            | 0.00       | 6,024             | 0.00       | 499,460            | 0.00       |
| 56        | Antae-eum        | 8,442             | 0.00       | 16,884            | 0.00       | 7,035             | 0.00       | 9,849             | 0.00       | 57,882            | 0.00       | 20,808            | 0.00       | 3,672             | 0.00       | 7,344             | 0.00       | 19,584            | 0.00       | 57,528            | 0.00       | 209,028            | 0.00       |
| Sub-total |                  | 1,539,417,<br>151 | 100.<br>00 | 2,637,992,<br>236 | 100.<br>00 | 2,906,947,<br>798 | 100.<br>00 | 3,121,745,<br>193 | 100.<br>00 | 3,308,086,<br>440 | 100.<br>00 | 3,581,870,<br>089 | 100.<br>00 | 4,101,998,<br>857 | 100.<br>00 | 4,471,473,<br>891 | 100.<br>00 | 5,112,299,<br>006 | 100.<br>00 | 5,617,493,<br>215 | 100.<br>00 | 36,399,324,<br>776 | 100.<br>00 |

Supplement 3. Frequent comorbidities associated with functional dyspepsia when the K30 code was the primary diagnosis

|                                                                            | Comorbidities                                                    |           |       |
|----------------------------------------------------------------------------|------------------------------------------------------------------|-----------|-------|
|                                                                            | Diagnosis code                                                   | N         | %     |
| M<br>(Diseases of the musculoskeletal system and connective tissue)        | M545 (Low back pain)                                             | 1,088,714 | 21.20 |
|                                                                            | M791 (Myalgia)                                                   | 712,326   | 13.87 |
|                                                                            | M626 (Muscle strain)                                             | 657,837   | 12.81 |
|                                                                            | M255 (Pain in joint)                                             | 420,624   | 8.19  |
|                                                                            | M542 (Cervicalgia)                                               | 273,707   | 5.33  |
|                                                                            | Sub-total                                                        | 5,134,993 | -     |
| R<br>(Symptoms, signs and abnormal clinical and laboratory findings, NEC)  | R101 (Pain localized to upper abdomen)                           | 408,190   | 26.36 |
|                                                                            | R51 (Headache)                                                   | 245,632   | 15.86 |
|                                                                            | R42 (Dizziness and giddiness)                                    | 179,760   | 11.61 |
|                                                                            | R104 (Other and unspecified abdominal pain)                      | 171,255   | 11.06 |
|                                                                            | R05 (Cough)                                                      | 98,758    | 6.38  |
|                                                                            | Sub-total                                                        | 1,548,721 | -     |
| S<br>(Injury, poisoning and certain other consequences of external causes) | S335 (Sprain and strain of lumbar spine)                         | 112,216   | 15.49 |
|                                                                            | S134 (Sprain and strain of cervical spine)                       | 86,404    | 11.93 |
|                                                                            | S934 (Sprain and strain of ankle)                                | 69,530    | 9.60  |
|                                                                            | S434 (Sprain and strain of shoulder joint)                       | 69,483    | 9.59  |
|                                                                            | S836 (Sprain and strain of other and unspecified parts of knee)  | 68,706    | 9.48  |
|                                                                            | Sub-total                                                        | 724,419   | -     |
| U<br>(Codes for special purposes)                                          | U680 (Spleen qi deficiency pattern)                              | 120,579   | 10.11 |
|                                                                            | U303 (Neck stiffness disorder)                                   | 117,430   | 9.84  |
|                                                                            | U280 (Food retention disorder)                                   | 75,068    | 6.29  |
|                                                                            | U238 (Joint impediment disorders)                                | 60,180    | 5.04  |
|                                                                            | U242 (Numbness disorder)                                         | 49,152    | 4.12  |
|                                                                            | Sub-total                                                        | 1,192,905 | -     |
| G<br>(Diseases of the nervous system)                                      | G442 (Tension-type headache)                                     | 107,126   | 23.07 |
|                                                                            | G470 (Disorders of initiating and maintaining sleep [insomnias]) | 79,078    | 17.03 |
|                                                                            | G439 (Migraine, unspecified)                                     | 73,391    | 15.80 |
|                                                                            | G438 (Other migraine)                                            | 29,937    | 6.45  |
|                                                                            | G430 (Migraine without aura [common migraine])                   | 19,443    | 4.19  |
|                                                                            | Sub-total                                                        | 464,379   | -     |
| J<br>(Diseases of the respiratory system)                                  | J00 (Acute nasopharyngitis [common cold])                        | 448,576   | 74.29 |
|                                                                            | J310 (Chronic rhinitis)                                          | 33,057    | 5.47  |
|                                                                            | J069 (Acute upper respiratory infection, unspecified)            | 22,655    | 3.75  |
|                                                                            | J304 (Allergic rhinitis, unspecified)                            | 16,238    | 2.69  |
|                                                                            | J029 (Acute pharyngitis, unspecified)                            | 8,904     | 1.47  |
|                                                                            | Sub-total                                                        | 603,784   | -     |
| K<br>(Diseases of the digestive system)                                    | K590 (Constipation)                                              | 85,602    | 31.83 |
|                                                                            | K591 (Functional diarrhoea)                                      | 49,466    | 18.39 |
|                                                                            | K297 (Gastritis, unspecified)                                    | 23,111    | 8.59  |
|                                                                            | K210 (Gastro-oesophageal reflux disease with oesophagitis)       | 14,610    | 5.43  |



|  |                              |         |      |
|--|------------------------------|---------|------|
|  | K291 (Other acute gastritis) | 12,213  | 4.54 |
|  | Sub-total                    | 268,972 | -    |
